# Supplementary material for: The Global Economic Impact of Manta Ray Watching Tourism
Source: PLoS One. 2013 May 31;8(5):e65051. doi: 10.1371/journal.pone.0065051 (PMC3669133; doi:10.1371/journal.pone.0065051)
Supplement: Table S2 — Direct Economic Impact of Manta Ray Watching Tourism. Research results used to calculate ratios of total expenditures to dive only expenditures to produce the country direct economic impact estimates summarized in Table 3. (PDF) [file pone.0065051.s002.pdf]

**Table S2. Direct Economic Impact of Manta Ray Watching Tourism (US\$)**

| <b>Expenditure Ratios from Diving Expenditure Sources</b>         | <b>Local Expenditure / Participant</b> | <b>Dive Expenditure</b>             | <b>Total Local Exp. / Dive Exp. (DEI Ratio)</b> | <b>Trip Type</b>                          | <b>Ref Year</b>                              | <b>Source</b>                                     |                                                      |                          |
|-------------------------------------------------------------------|----------------------------------------|-------------------------------------|-------------------------------------------------|-------------------------------------------|----------------------------------------------|---------------------------------------------------|------------------------------------------------------|--------------------------|
| Australia, GBR (N. Queensland) - Per Trip                         | AUD 2,600                              | AUD 1,300                           | 200%                                            | Live aboard - varied                      | 2006-7                                       | [42]                                              |                                                      |                          |
| W. Australia (Ningaloo) - Per Day                                 | AUD 186                                | AUD 76                              | 246%                                            | Whale sharks                              | 2006                                         | [43]                                              |                                                      |                          |
| Fiji - Per Day                                                    | USD 212                                | USD 84                              | 252%                                            | Sharks                                    | 2011                                         | [18]                                              |                                                      |                          |
| Fr. Polynesia (Moorea) - Per Day                                  | USD 377                                | USD 139                             | 271%                                            | Lemon sharks                              | 2011                                         | [6]                                               |                                                      |                          |
| Palau - Per Trip                                                  | USD 2,081                              | USD 749                             | 278%                                            | Sharks                                    | 2010                                         | [50]                                              |                                                      |                          |
| Thailand - Per Trip                                               | THB 40,000                             | THB 24,010                          | 167%                                            | Diving                                    | 2007-9                                       | [49]                                              |                                                      |                          |
|                                                                   |                                        |                                     |                                                 |                                           |                                              |                                                   |                                                      |                          |
| <b>Expenditure Ratios from Whale Watching Expenditure Sources</b> | <b>WW Ticket Exp. / Participant</b>    | <b>Assoc. Exp. / Participant WW</b> | <b>Total Local Exp. / Participant WW</b>        | <b>Manta Dive Trip Cost / Participant</b> | <b>Total Exp. / Participant Manta Diving</b> | <b>Total Exp. / WW Ticket Cost (DEI Ratio WW)</b> | <b>Total Exp. / MD Cost (DEI Ratio Manta Diving)</b> | <b>Ref Year / Source</b> |
| Australia, GBR (Queensland)                                       | \$28                                   | \$146                               | \$174                                           | \$108                                     | \$254                                        | 616%                                              | 235%                                                 | [20], 2008               |
| W. Australia                                                      | \$34                                   | \$156                               | \$191                                           | \$108                                     | \$264                                        | 554%                                              | 245%                                                 | [20], 2008               |
| Costa Rica                                                        | \$50                                   | \$150                               | \$200                                           | \$100                                     | \$250                                        | 398%                                              | 250%                                                 | [20], 2008               |
| Ecuador                                                           | \$1,171                                | \$234                               | \$1,405                                         | \$150                                     | \$384                                        | 120%                                              | 256%                                                 | [20], 2008               |
| FSM                                                               | \$46                                   | \$111                               | \$157                                           | \$120                                     | \$231                                        | 343%                                              | 192%                                                 | [20], 2008               |
| Fr. Polynesia (Bora Bora)                                         | \$94                                   | \$121                               | \$215                                           | \$137                                     | \$258                                        | 229%                                              | 188%                                                 | [20], 2008               |
| Indonesia                                                         | \$14                                   | \$33                                | \$47                                            | \$78                                      | \$111                                        | 332%                                              | 142%                                                 | [20], 2008               |

### Direct Economic Impact of Manta Ray Watching Tourism (US\$)

| Japan              | \$38                   | \$80                | \$118                  | \$211      | \$330 | 308% | 156% | [20], 2008 |
|--------------------|------------------------|---------------------|------------------------|------------|-------|------|------|------------|
| Madagascar         | \$51                   | \$63                | \$115                  | \$76       | \$139 | 224% | 184% | [20], 2008 |
| Maldives           | \$36                   | \$40                | \$76                   | \$44       | \$84  | 211% | 191% | [20], 2008 |
| Mexico             | \$53                   | \$450               | \$503                  | \$446      | \$896 | 942% | 201% | [20], 2008 |
| Mozambique         | \$58                   | \$85                | \$143                  | \$118      | \$203 | 246% | 171% | [20], 2008 |
| New Caledonia      | \$85                   | \$125               | \$210                  | \$103      | \$229 | 247% | 221% | [20], 2008 |
| Philippines        | \$32                   | \$60                | \$92                   | \$94       | \$154 | 289% | 164% | [20], 2008 |
| Sudan (Egypt # 's) | \$58                   | \$98                | \$156                  | \$142      | \$240 | 269% | 169% | [20], 2008 |
| USA, Hawaii        | \$38                   | \$254               | \$292                  | \$110      | \$364 | 778% | 331% | [20], 2008 |
|                    |                        |                     |                        |            |       |      |      |            |
| Country            | Manta Dive Expenditure | Trip Exp / Dive Exp | Direct Economic Impact | Source(s)  |       |      |      |            |
| Australia          | \$6,529,435            | 223%                | \$14,560,640           | [42,43]    |       |      |      |            |
| Costa Rica         | \$109,200              | 250%                | \$273,000              | [20]       |       |      |      |            |
| Ecuador            | \$726,126              | 256%                | \$1,858,883            | [20]       |       |      |      |            |
| Fiji               | \$630,148              | 252%                | \$1,587,973            | [18]       |       |      |      |            |
| Fr. Polynesia      | \$1,367,625            | 271%                | \$3,706,264            | [6]        |       |      |      |            |
| FSM                | \$4,091,520            | 192%                | \$7,855,718            | [20]       |       |      |      |            |
| India              | \$198,890              | 167%                | \$332,146              | [49]       |       |      |      |            |
| Indonesia          | \$10,655,022           | 142%                | \$15,130,131           | [20]       |       |      |      |            |
| Japan              | \$11,400,103           | 156%                | \$17,784,161           | [20]       |       |      |      |            |
| Kiribati           | \$17,500               | 192%                | \$33,600               | [20] - FSM |       |      |      |            |
| Madagascar         | \$206,498              | 184%                | \$379,956              | [20]       |       |      |      |            |
| Maldives           | \$8,100,000            | 191%                | \$15,471,000           | [20]       |       |      |      |            |
| Mexico             | \$5,084,600            | 201%                | \$10,220,046           | [20]       |       |      |      |            |
| Mozambique         | \$7,640,351            | 171%                | \$13,065,000           | [20]       |       |      |      |            |
| Myanmar            | \$157,606              | 167%                | \$263,202              | [49]       |       |      |      |            |
| New Caledonia      | \$524,988              | 221%                | \$1,160,223            | [20]       |       |      |      |            |
| Palau              | \$2,455,108            | 278%                | \$6,825,200            | [50]       |       |      |      |            |
| Papua New Guinea   | \$175,561              | 192%                | \$337,077              | [20] - FSM |       |      |      |            |
| Philippines        | \$863,479              | 164%                | \$1,416,106            | [20]       |       |      |      |            |
| Solomon Islands    | \$319,332              | 192%                | \$613,117              | [20] - FSM |       |      |      |            |

## Direct Economic Impact of Manta Ray Watching Tourism (US\$)

|                                                                                                                                                                                                                                                                                                                                                                                                                                                                                                                                                                                                                       |                     |              |                      |              |
|-----------------------------------------------------------------------------------------------------------------------------------------------------------------------------------------------------------------------------------------------------------------------------------------------------------------------------------------------------------------------------------------------------------------------------------------------------------------------------------------------------------------------------------------------------------------------------------------------------------------------|---------------------|--------------|----------------------|--------------|
| Sudan                                                                                                                                                                                                                                                                                                                                                                                                                                                                                                                                                                                                                 | \$13,506            | 169%         | \$22,825             | [20] - Egypt |
| Thailand                                                                                                                                                                                                                                                                                                                                                                                                                                                                                                                                                                                                              | \$7,418,750         | 167%         | \$12,389,313         | [49]         |
| USA                                                                                                                                                                                                                                                                                                                                                                                                                                                                                                                                                                                                                   | \$4,661,938         | 331%         | \$15,431,015         | [20]         |
| <b>Global Total</b>                                                                                                                                                                                                                                                                                                                                                                                                                                                                                                                                                                                                   | <b>\$73,347,286</b> |              | <b>\$140,716,597</b> |              |
| <b>DEI Ratio Notes</b>                                                                                                                                                                                                                                                                                                                                                                                                                                                                                                                                                                                                |                     |              |                      |              |
| <b>Summary:</b>                                                                                                                                                                                                                                                                                                                                                                                                                                                                                                                                                                                                       |                     |              |                      |              |
| 13 - Ratios adapted from O'Connor et al. [20] replacing WW ticket expenditure (DE) with Manta dive trip cost:<br>Costa Rica, Ecuador, FSM, Indonesia, Japan, Madagascar, Maldives, Mexico, Mozambique, New Caledonia, Philippines,<br>Sudan (using #'s from Egypt), USA (Hawaii)                                                                                                                                                                                                                                                                                                                                      |                     |              |                      |              |
| 3 - Applied FSM ratio from [20]: Solomon Islands, Papua New Guinea and Kiribati                                                                                                                                                                                                                                                                                                                                                                                                                                                                                                                                       |                     |              |                      |              |
| 4 - Ratios from published studies on economic impact of shark diving:<br>Australia [42,43], Fiji [18], French Polynesia [6], Palau [50]                                                                                                                                                                                                                                                                                                                                                                                                                                                                               |                     |              |                      |              |
| 3 - Ratio from published study by Tourism Authority Thailand[49] on scuba diving tourists and expenditures:<br>Thailand and applied same ratio to Myanmar and India, since trips to these locations originate from Thailand on Thai boats                                                                                                                                                                                                                                                                                                                                                                             |                     |              |                      |              |
| <b>Australia:</b> There were two published expenditure estimates for diving - Jones et al. [43] for Western Australia;<br>Stoeckl et al. [42] for GBR (Queensland); and two estimates for whale watching expenditures from O'Connor et al. [20]<br>- one for Western Australia and one for GBR (Queensland).<br>Stoeckl ratio: Median cost of live aboard dive trip ~ AUD 1,300; Median regional assoc. exp./diver ~ AUD 1,300<br>Jones ratio: Whale shark tourism participants - Mean expenditure / day; Mean activity expenditure / day<br>We opted to use the average of the 2 shark diving expenditure estimates. |                     |              |                      |              |
| The four Australia estimates were:                                                                                                                                                                                                                                                                                                                                                                                                                                                                                                                                                                                    |                     |              |                      |              |
|                                                                                                                                                                                                                                                                                                                                                                                                                                                                                                                                                                                                                       | Queensland          | W. Australia | Avg Australia        |              |
| O'Connor [20]                                                                                                                                                                                                                                                                                                                                                                                                                                                                                                                                                                                                         | 235%                |              | 240%                 |              |
| O'Connor [20]                                                                                                                                                                                                                                                                                                                                                                                                                                                                                                                                                                                                         |                     | 245%         |                      |              |
| Stoeckl [42]                                                                                                                                                                                                                                                                                                                                                                                                                                                                                                                                                                                                          | 200%                |              | <b>223%</b>          |              |
| Jones [43]                                                                                                                                                                                                                                                                                                                                                                                                                                                                                                                                                                                                            |                     | 246%         |                      |              |
| <b>Fiji:</b> Average daily local expenditures by divers in Fiji per Vianna et al. [18];<br>Average daily cost for manta diving per this study, since dive costs were not available.                                                                                                                                                                                                                                                                                                                                                                                                                                   |                     |              |                      |              |

**Direct Economic Impact of Manta Ray Watching Tourism (US\$)**

|                                                                                                                                  |  |  |  |  |
|----------------------------------------------------------------------------------------------------------------------------------|--|--|--|--|
| <b>French Polynesia:</b> Ratio estimated from the following values provided in Clua et al. [6]:                                  |  |  |  |  |
| Avg. Daily Associated Expenditures: (\$186 acc. + \$52 meals)= \$ 238 (AE)                                                       |  |  |  |  |
| Avg. Cost (Int'l and Local divers) of 2 tank dive trip = \$139 (DE)                                                              |  |  |  |  |
| Dive expenditure plus associated expenditures = \$377                                                                            |  |  |  |  |
|                                                                                                                                  |  |  |  |  |
| <b>Palau:</b> From Vianna et al. [50], avg. trip expenditure per diver; avg. dive expenditure per diver per trip                 |  |  |  |  |
|                                                                                                                                  |  |  |  |  |
| <b>Thailand:</b> From Tourism Authority Thailand [49], avg. trip expenditure per diver; avg. dive expenditure per diver per trip |  |  |  |  |
|                                                                                                                                  |  |  |  |  |
